# Supplementary material for: Bacterial capsular polysaccharides with antibiofilm activity share common biophysical and electrokinetic properties
Source: PubMed Central journal article supplement (PMC10156666; doi:10.1038/s41467-023-37925-8), 2023-05-03
Supplement: 41467_2023_37925_MOESM1_ESM.pdf [file 41467_2023_37925_MOESM1_ESM.pdf]

## SUPPLEMENTARY INFORMATION

*Bacterial capsular polysaccharides with antibiofilm activity share common biophysical and electrokinetic properties*

Joaquín Bernal-Bayard *et al.*

This PDF file includes:

Supplementary Tables 1 to 3

Supplementary Figures 1 to 8

Supplementary References

## SUPPLEMENTARY TABLES

**Supplementary Table 1.** Name, origin, primary structure and properties of the polysaccharides used in this study<sup>1</sup>.

| Name <sup>1</sup> | Bacteria                                    | Primary structure                                                                                                                                                                                                                                                                                                                                                                                                                        | Antibiofilm activity | References |
|-------------------|---------------------------------------------|------------------------------------------------------------------------------------------------------------------------------------------------------------------------------------------------------------------------------------------------------------------------------------------------------------------------------------------------------------------------------------------------------------------------------------------|----------------------|------------|
| PnPS1             | <i>Streptococcus pneumoniae</i> serotype 1  | $\begin{array}{c} 2/3\text{-(OAc)}_{68\%} \\   \\ [3\text{-}\alpha\text{-AATp}\text{-}(1\rightarrow 4)\text{-}\alpha\text{-D-GalpA}\text{-}(1\rightarrow 3)\text{-}\alpha\text{-D-GalpA}\text{-}(1\rightarrow)_n \end{array}$                                                                                                                                                                                                            | -                    | 1 2        |
| PnPS2             | <i>Streptococcus pneumoniae</i> serotype 2  | $\begin{array}{c} 2 \\ \uparrow \\ [4\text{-}\beta\text{-D-Glcp}\text{-}(1\rightarrow 3)\text{-}\alpha\text{-L-Rhap}\text{-}(1\rightarrow 3)\text{-}\alpha\text{-L-Rhap}\text{-}(1\rightarrow 3)\text{-}\beta\text{-L-Rhap}\text{-}(1\rightarrow)_n \\ \uparrow \\ \alpha\text{-D-GlcAp}\text{-}(1\rightarrow 6)\text{-}\alpha\text{-D-Glcp} \end{array}$                                                                                | -                    | 3          |
| PnPS3             | <i>Streptococcus pneumoniae</i> serotype 3  | $[4\text{-}\beta\text{-D-Glcp}\text{-}(1\rightarrow 3)\text{-}\beta\text{-D-GlcpA}\text{-}(1\rightarrow)_n$                                                                                                                                                                                                                                                                                                                              | G+ / ~ G-            | 4 2        |
| PnPS4             | <i>Streptococcus pneumoniae</i> serotype 4  | $[3\text{-}\beta\text{-D-ManpNAC}\text{-}(1\rightarrow 3)\text{-}\alpha\text{-L-FucpNAC}\text{-}(1\rightarrow 3)\text{-}\alpha\text{-D-GalpNAC}\text{-}(1\rightarrow 4)\text{-}\alpha\text{-D-Galp}\text{-}(2,3\text{-s-pyruvate})(1\rightarrow)_n$                                                                                                                                                                                      | -                    | 5 6        |
| PnPS5             | <i>Streptococcus pneumoniae</i> serotype 5  | $\begin{array}{c} 3 \\ \uparrow \\ [4\text{-}\beta\text{-D-Glcp}\text{-}(1\rightarrow 4)\text{-}\alpha\text{-L-FucpNAC}\text{-}(1\rightarrow 3)\text{-}\beta\text{-D-Sugp}\text{-}(1\rightarrow)_n \\ \uparrow \\ \alpha\text{-L-PnepNAC}\text{-}(1\rightarrow 2)\text{-}\beta\text{-D-GlcpA} \end{array}$                                                                                                                               | -                    | 7 6        |
| PnPS6B            | <i>Streptococcus pneumoniae</i> serotype 6B | $[2\text{-}\alpha\text{-D-Galp}\text{-}(1\rightarrow 3)\text{-}\alpha\text{-D-Glcp}\text{-}(1\rightarrow 3)\text{-}\alpha\text{-L-Rhap}\text{-}(1\rightarrow 4)\text{-D-Ribitol-5-P}\text{-}(O)_n$                                                                                                                                                                                                                                       | -                    | 8 2        |
| PnPS7F            | <i>Streptococcus pneumoniae</i> serotype 7F | $\begin{array}{c} 2\text{-OAc} \\   \\ [6\text{-}\alpha\text{-D-Galp}\text{-}(1\rightarrow 3)\text{-}\beta\text{-L-Rhap}\text{-}(1\rightarrow 4)\text{-}\beta\text{-D-Glcp}\text{-}(1\rightarrow 3)\text{-}\beta\text{-D-GalpNAC}\text{-}(1\rightarrow)_n \\ \uparrow \qquad \qquad \qquad \uparrow \\ \beta\text{-D-Galp} \qquad \qquad \qquad \alpha\text{-D-GlcpNAC}\text{-}(1\rightarrow 2)\text{-}\alpha\text{-L-Rhap} \end{array}$ | -                    | 9 2        |
| PnPS8             | <i>Streptococcus pneumoniae</i> serotype 8  | $[4\text{-}\beta\text{-D-GlcpA}\text{-}(1\rightarrow 4)\text{-}\beta\text{-D-Glcp}\text{-}(1\rightarrow 4)\text{-}\alpha\text{-D-Glcp}\text{-}(1\rightarrow 4)\text{-}\alpha\text{-D-Galp}\text{-}(1\rightarrow)_n$                                                                                                                                                                                                                      | -                    | 10 2       |
| PnPS9N            | <i>Streptococcus pneumoniae</i> serotype 9N | $[4\text{-}\alpha\text{-D-GlcpA}\text{-}(1\rightarrow 3)\text{-}\alpha\text{-D-Glcp}\text{-}(1\rightarrow 3)\text{-}\beta\text{-D-ManpNAC}\text{-}(1\rightarrow 4)\text{-}\beta\text{-D-Glcp}\text{-}(1\rightarrow 4)\text{-}\alpha\text{-D-GlcpNAC}\text{-}(1\rightarrow)_n$                                                                                                                                                            | -                    | 11 2       |
| PnPS9V            | <i>Streptococcus pneumoniae</i> serotype 9V | $\begin{array}{c}   \qquad \qquad \qquad   \\ [4\text{-}\alpha\text{-D-Glcp}\text{-}(1\rightarrow 4)\text{-}\alpha\text{-D-GlcpA}\text{-}(1\rightarrow 3)\text{-}\alpha\text{-L-Galp}\text{-}(1\rightarrow 3)\text{-}\beta\text{-D-ManpNAC}\text{-}(1\rightarrow 4)\text{-}\beta\text{-D-Glcp}\text{-}(1\rightarrow)_n \\ 2/3\text{-(OAc)}_{80\%} \qquad \qquad \qquad 4/6\text{-(OAc)}_{113\%} \end{array}$                             | -                    | 12 2       |

|         |                                                                |                                                                                                                                                                                                                                                                                                                                                                                                                                                             |         |      |
|---------|----------------------------------------------------------------|-------------------------------------------------------------------------------------------------------------------------------------------------------------------------------------------------------------------------------------------------------------------------------------------------------------------------------------------------------------------------------------------------------------------------------------------------------------|---------|------|
| PnPS10A | <i>Streptococcus pneumoniae</i> serotype 10A                   | $  \begin{array}{c}  \beta\text{-D-Galp} \\  \downarrow 1 \\  [5]\text{-}\beta\text{-D-Galf}\text{-}(1\rightarrow 3)\text{-}\beta\text{-D-Galp}\text{-}(1\rightarrow 4)\text{-}\beta\text{-D-GalpNAc}\text{-}(1\rightarrow 3)\text{-}\alpha\text{-D-Galp}\text{-}(1\rightarrow 2)\text{-D-Ribitol-5-}P\text{-}(O\rightarrow)_n \\  \uparrow 3 \\  \beta\text{-D-Galf}  \end{array}  $                                                                       | -       | 13 2 |
| PnPS11A | <i>Streptococcus pneumoniae</i> serotype 11A                   | $  \begin{array}{c}  2/3\text{-}(OAc)_{110\%} \quad 4/6\text{-}(OAc)_{50\%} \\    \quad   \\  [6]\text{-}\alpha\text{-D-Glcp}\text{-}(1\rightarrow 4)\text{-}\alpha\text{-D-Galp}\text{-}(1\rightarrow 3)\text{-}\beta\text{-D-Galp}\text{-}(1\rightarrow 4)\text{-}\beta\text{-D-Glcp}\text{-}(1\rightarrow)_n \\    \\  4 \\    \\  O\text{-}P\text{-}1\text{-Glycerol}  \end{array}  $                                                                   | -       | 14 2 |
| PnPS12F | <i>Streptococcus pneumoniae</i> serotype 12F                   | $  \begin{array}{c}  [4]\text{-}\alpha\text{-L-FucpNAc}\text{-}(1\rightarrow 3)\text{-}\beta\text{-D-GalpNAc}\text{-}(1\rightarrow 4)\text{-}\beta\text{-D-ManpNAcA}\text{-}(1\rightarrow)_n \\  \uparrow 3 \quad \uparrow 3 \\  \alpha\text{-D-Galp} \quad \alpha\text{-D-Glcp}\text{-}(1\rightarrow 2)\text{-}\alpha\text{-D-Glcp}  \end{array}  $                                                                                                        | G- only | 15 2 |
| PnPS14  | <i>Streptococcus pneumoniae</i> serotype 14                    | $  \begin{array}{c}  [6]\text{-}\beta\text{-D-GlcpNAc}\text{-}(1\rightarrow 3)\text{-}\beta\text{-D-Galp}\text{-}(1\rightarrow 4)\text{-}\beta\text{-D-Glcp}\text{-}(1\rightarrow)_n \\  \uparrow 4 \\  \beta\text{-D-Galp}  \end{array}  $                                                                                                                                                                                                                 | -       | 16 2 |
| PnPS15B | <i>Streptococcus pneumoniae</i> serotype 15B                   | $  \begin{array}{c}  [6]\text{-}\beta\text{-D-GlcpNAc}\text{-}(1\rightarrow 3)\text{-}\beta\text{-D-Galp}\text{-}(1\rightarrow 4)\text{-}\beta\text{-D-Glcp}\text{-}(1\rightarrow)_n \\  \uparrow 4 \\  \alpha\text{-D-Galp}\text{-}(1\rightarrow 2)\text{-}\beta\text{-D-Galp} \\    \quad   \\  1 \quad 3 \\  2/3/4/6\text{-}(OAc)_{85\%} \quad O\text{-}P\text{-}2\text{-Glycerol}  \end{array}  $                                                       | -       | 17 6 |
| PnPS17F | <i>Streptococcus pneumoniae</i> serotype 17F                   | $  \begin{array}{c}  [3]\text{-}\beta\text{-L-Rhap}\text{-}(1\rightarrow 4)\text{-D-Glcp}\text{-}(1\rightarrow 3)\text{-}\alpha\text{-D-Galp}\text{-}(1\rightarrow 3)\text{-}\beta\text{-L-Rhap}\text{-}(1\rightarrow 4)\text{-}\alpha\text{-L-Rhap}\text{-}(1\rightarrow 2)\text{-D-Ara-ol-1-}P\text{-}(O\rightarrow)_n \\  \uparrow 4 \\  \beta\text{-D-Galp}  \end{array}  $                                                                             | -       | 18 2 |
| PnPS18C | <i>Streptococcus pneumoniae</i> serotype 18C                   | $  \begin{array}{c}  6\text{-}(OAc)_{30\%} \\    \\  \alpha\text{-D-Glcp} \\  \downarrow 1 \\  [4]\text{-}\beta\text{-D-Glcp}\text{-}(1\rightarrow 4)\text{-}\beta\text{-D-Galp}\text{-}(1\rightarrow 4)\text{-}\alpha\text{-D-Glcp}\text{-}(1\rightarrow 3)\text{-}\alpha\text{-L-Rhap}\text{-}(1\rightarrow)_n \\  \uparrow 3 \\  O\text{-}P\text{-}2\text{-Glycerol}  \end{array}  $                                                                     | G+ only | 19 6 |
| PnPS19A | <i>Streptococcus pneumoniae</i> serotype 19A                   | $  [4]\text{-}\beta\text{-D-ManpNAc}\text{-}(1\rightarrow 4)\text{-}\alpha\text{-D-Glcp}\text{-}(1\rightarrow 3)\text{-}\alpha\text{-L-Rhap-1-}P\text{-}(O\rightarrow)_n  $                                                                                                                                                                                                                                                                                 | -       | 20 2 |
| PnPS19F | <i>Streptococcus pneumoniae</i> serotype 19F                   | $  [4]\text{-}\beta\text{-D-ManpNAc}\text{-}(1\rightarrow 4)\text{-}\alpha\text{-D-Glcp}\text{-}(1\rightarrow 2)\text{-}\alpha\text{-L-Rhap-1-}P\text{-}(O\rightarrow)_n  $                                                                                                                                                                                                                                                                                 | -       | 21 2 |
| PnPS20  | <i>Streptococcus pneumoniae</i> serotype 20                    | $  \begin{array}{c}  6\text{-}(OAc)_{90\%} \\    \\  [6]\text{-}\alpha\text{-D-Glcp}\text{-}(1\rightarrow 6)\text{-}\beta\text{-D-Glcp}\text{-}(1\rightarrow 3)\text{-}\beta\text{-D-Galf}\text{-}(1\rightarrow 3)\text{-}\beta\text{-D-Glcp}\text{-}(1\rightarrow 3)\text{-}\alpha\text{-D-GlcpNAc-1-}P\text{-}(O\rightarrow)_n \\    \quad \uparrow 4 \\  5\text{-}(OAc)_{90\%} \quad \beta\text{-D-Galf} \\    \\  2\text{-}(OAc)_{90\%}  \end{array}  $ | -       | 12 2 |
| PnPS22F | <i>Streptococcus pneumoniae</i> serotype 22F                   | $  \begin{array}{c}  \beta\text{-D-Glcp} \\  \downarrow 1 \\  [4]\text{-}\beta\text{-D-GlcpA}\text{-}(1\rightarrow 4)\text{-}\beta\text{-L-Rhap}\text{-}(1\rightarrow 4)\text{-}\alpha\text{-D-Glcp}\text{-}(1\rightarrow 3)\text{-}\alpha\text{-D-Galf}\text{-}(1\rightarrow 2)\text{-}\alpha\text{-L-Rhap}\text{-}(1\rightarrow)_n \\    \\  2\text{-}(OAc)_{80\%}  \end{array}  $                                                                        | -       | 22 2 |
| PnPS23F | <i>Streptococcus pneumoniae</i> serotype 23F                   | $  \begin{array}{c}  \alpha\text{-L-Rhap} \\  \downarrow 1 \\  [4]\text{-}\beta\text{-D-Glcp}\text{-}(1\rightarrow 4)\text{-}\beta\text{-D-Galp}\text{-}(1\rightarrow 4)\text{-}\beta\text{-L-Rhap}\text{-}(1\rightarrow)_n \\  \uparrow 3 \\  O\text{-}P\text{-}2\text{-Glycerol}  \end{array}  $                                                                                                                                                          | -       | 23 2 |
| PnPS33F | <i>Streptococcus pneumoniae</i> serotype 33F                   | $  \begin{array}{c}  [3]\text{-}\beta\text{-D-Galp}\text{-}(1\rightarrow 3)\text{-}\alpha\text{-D-Galp}\text{-}(1\rightarrow 3)\text{-}\beta\text{-D-Galf}\text{-}(1\rightarrow 3)\text{-}\beta\text{-D-Glcp}\text{-}(1\rightarrow 5)\text{-}\beta\text{-D-Galf}\text{-}(1\rightarrow)_n \\  \uparrow 2 \quad \uparrow 1 \\  \alpha\text{-D-Galp} \quad 2\text{-}(OAc)_{50\%}  \end{array}  $                                                               | -       | 24 2 |
| CWPS    | Non-capsulated <i>Streptococcus pneumoniae</i> strain CSR SCS2 | $  \begin{array}{c}  [6]\text{-}\beta\text{-D-Glcp}\text{-}(1\rightarrow 3)\text{-}\alpha\text{-AATp}\text{-}(1\rightarrow 4)\text{-}\alpha\text{-D-GalpNAc}\text{-}(1\rightarrow 3)\text{-}\beta\text{-D-GalpNAc}\text{-}(1\rightarrow 1)\text{-D-Ribitol-5-}P\text{-}(O\rightarrow)_n \\  \uparrow 6 \\  O\text{-}P\text{-}Cho  \end{array}  $                                                                                                            | -       | 25   |

|                |                                                 |                                                                                    |           |                            |
|----------------|-------------------------------------------------|------------------------------------------------------------------------------------|-----------|----------------------------|
| <b>Vi</b>      | <i>Salmonella enterica</i><br>Serovar Typhi     | 3-(OAc) <sub>90%</sub><br> <br>[4]-α-D-GalpNAc-(1→) <sub>n</sub>                   | G+ / ~ G- | 26                         |
| <b>PRP</b>     | <i>Haemophilus influenzae</i><br>serotype b     | [3]-β-D-Ribf-(1→1)-D-Ribitol-5-P-(O→) <sub>n</sub>                                 | G+ / ~ G- | 27                         |
| <b>MenA</b>    | <i>Neisseria meningitidis</i><br>serogroup A    | 3/4-(OAc) <sub>90%</sub><br> <br>[6]-α-D-ManpNAc-1-P-(O→) <sub>n</sub>             | G+ & G-   | 28                         |
| <b>MenC</b>    | <i>Neisseria meningitidis</i><br>serogroup C    | 7/8-(OAc) <sub>90%</sub><br> <br>[9]-α-D-Neup5Ac-(2→) <sub>n</sub>                 | G+ & G-   | 28                         |
| <b>MenY</b>    | <i>Neisseria meningitidis</i><br>serogroup Y    | 7/9-(OAc) <sub>~50%</sub><br> <br>[4]-α-D-Neup5Ac-(2→6)-α-D-Glcp-(1→) <sub>n</sub> | G+ & G-   | 28                         |
| <b>MenW135</b> | <i>Neisseria meningitidis</i><br>serogroup W135 | 7/9-(OAc) <sub>~60%</sub><br> <br>[4]-α-D-Neup5Ac-(2→6)-α-D-Galp-(1→) <sub>n</sub> | G+ & G-   | 28                         |
| <b>G2cps</b>   | <i>Escherichia coli</i><br>strain CFT073        | 3-(OAc) <sub>100%</sub><br> <br>[4]-α-D-Galp-(1→2)-Glycerol-3-P-(O→) <sub>n</sub>  | G+ & G-   | <sup>29</sup> , this study |

In bold: active broad spectrum antibiofilm polysaccharides. Underlined: active narrow spectrum antibiofilm polysaccharides.

<sup>1</sup>: All polysaccharides produced and purified from *S. pneumoniae*, *N. meningitidis*, *S. Typhi* and *H. influenzae* strains used in this study were obtained from Sanofi, Marcy l'Etoile France and Swiftwater, USA.

**Supplementary Table 2.** Electrokinetic and size properties of the polysaccharidic macromolecules tested in this work.

| <b>Polysaccharide</b> | <b><math> \rho_0/F </math> (mM)</b> | <b><math>1/\lambda_0</math> (nm)</b> | <b>Size <math>d</math> (nm)<br/><math>\pm</math> standard deviation</b> |
|-----------------------|-------------------------------------|--------------------------------------|-------------------------------------------------------------------------|
| <b>Vi</b>             |                                     |                                      | $15.6 \pm 0.7$                                                          |
| PnPS4                 | 9.7                                 | 3.3                                  | $380.2 \pm 39.1$                                                        |
| PnPS10A               | 14.8                                | 2.3                                  | $25.9 \pm 4.3$                                                          |
| PnPS15B               | 15.9                                | 2.4                                  | $29.1 \pm 2.5$                                                          |
| PnPS20                | 13.2                                | 2.4                                  | $32.1 \pm 2.5$                                                          |
| PnPS19A               | 15.8                                | 2.9                                  | $20.9 \pm 4.2$                                                          |
| PnPS8                 | 20.5                                | 2.5                                  | $23.4 \pm 1.4$                                                          |
| <b>MenA</b>           |                                     |                                      | $12.1 \pm 0.7$                                                          |
| <b>MenC</b>           | 52.8                                | 1.7                                  | $25.4 \pm 1.9$                                                          |
| <b>MenY</b>           | 48.4                                | 1.5                                  | $26.9 \pm 1.8$                                                          |
| <b>PnPS3</b>          | 18.7                                | 3.2                                  | $26.3 \pm 3.9$                                                          |
| PnPS1                 | 20.1                                | 2.5                                  | $26 \pm 2.3$                                                            |
| PnPS9V                | 25.7                                | 1.4                                  | $8.7 \pm 1.6$                                                           |
| <b>PRP</b>            | 20.3                                | 3.4                                  | $28.4 \pm 5$                                                            |
| <b>G2cps</b>          | 18.1                                | 3.2                                  | $40 \pm 15$                                                             |
| PnPS7F                | 10.9                                | 3.1                                  | $39.4 \pm 2.7$                                                          |
| PnPS22F               | 15.6                                | 2.3                                  | $26.3 \pm 1.9$                                                          |
| PnPS14                | 30.3                                | 1.6                                  | $15.2 \pm 5.1$                                                          |
| <b>MenW135</b>        |                                     |                                      | $28.3 \pm 3.1$                                                          |
| <u>PnPS18C</u>        |                                     |                                      | $26.7 \pm 2.2$                                                          |
| <u>PnPS12F</u>        |                                     |                                      | $29.5 \pm 3.3$                                                          |

In bold: active broad-spectrum antibiofilm polysaccharides. Underlined: active narrow spectrum antibiofilm polysaccharides. In black: inactive polysaccharides.  $d$  stands for the diameter of the macromolecules ( $d=2b$  where  $b$  is the particle radius involved in eq. 1). The values  $\rho_0/F$  and  $1/\lambda_0$  for the polysaccharides Vi, MenA, MenW135 and PnPS18C, PnPS12F fall within the space solution defined by the red and blue zones in Figure 6, respectively.

### Supplementary Table 3. Bacterial strains used in this study.

| Strain                                                  | Relevant characteristics                                        | Source/Reference |
|---------------------------------------------------------|-----------------------------------------------------------------|------------------|
| <i>Strains producing antibiofilm polysaccharides</i>    |                                                                 |                  |
| <i>E. coli</i> CFT073                                   | Uropathogenic <i>E. coli</i> - group 2 capsule producer         | 30               |
| <i>Strains used as biofilm test panel</i>               |                                                                 |                  |
| <i>E. coli</i> K-12 MG1655 <i>F<sup>tet</sup> ΔtraD</i> | <i>traD::apra</i> plasmid, Apra <sup>R</sup> , Tet <sup>R</sup> | 29               |
| <i>Enterobacter cloacae</i> 1092                        |                                                                 | 31               |
| <i>Klebsiella pneumoniae</i> U21                        | Clinical isolate                                                | 31               |
| <i>Staphylococcus aureus</i> 15981                      |                                                                 | 32               |
| <i>Staphylococcus epidermidis</i> 047                   |                                                                 | 33               |

## SUPPLEMENTARY FIGURES

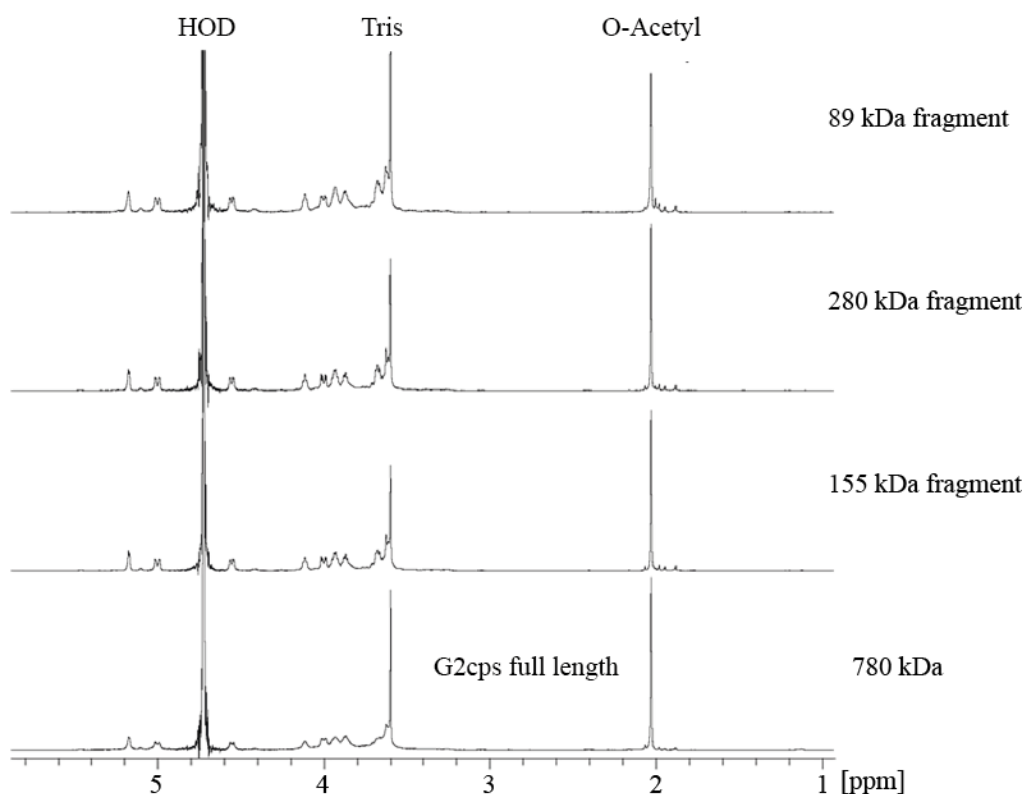

Supplementary Figure 1. **<sup>1</sup>H NMR spectra of native G2cps polysaccharide and corresponding fragments obtained by radical oxidation hydrolysis.** The analysis was performed at 20°C. On each spectrum is indicated the molecular weight *M<sub>w</sub>* (kDa) determined by HPSEC. HOD: signal of residual water.

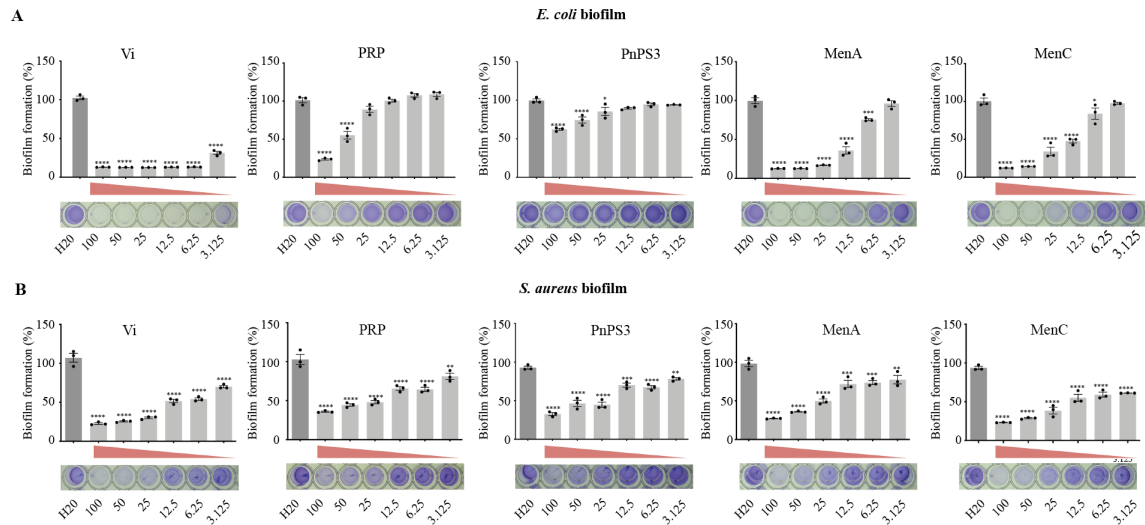

Supplementary Figure 2. **Level of antibiofilm activity of bacterial polysaccharides.** *E. coli* (A) and *S. aureus* (B) biofilm inhibition test (CV staining in microtiter plates) in presence of increasing concentrations of the indicated bacterial capsular polysaccharides produced by *Streptococcus pneumoniae*, *Salmonella enterica* serovar Typhi, *Haemophilus influenzae*, *Neisseria meningitidis*. Polysaccharide concentrations range from 3.125 to 100 µg/ml. Distilled water was used as a negative control. Each experiment corresponds to n=3 biologically independent experiments. Statistical analyses correspond to two-tailed unpaired *t*-test with Welch correction. \* p<0.05; \*\* p<0.01; \*\*\* p<0.001; \*\*\*\* p<0.0001. Source data are provided as a Source Data file. Error bars represent SD.

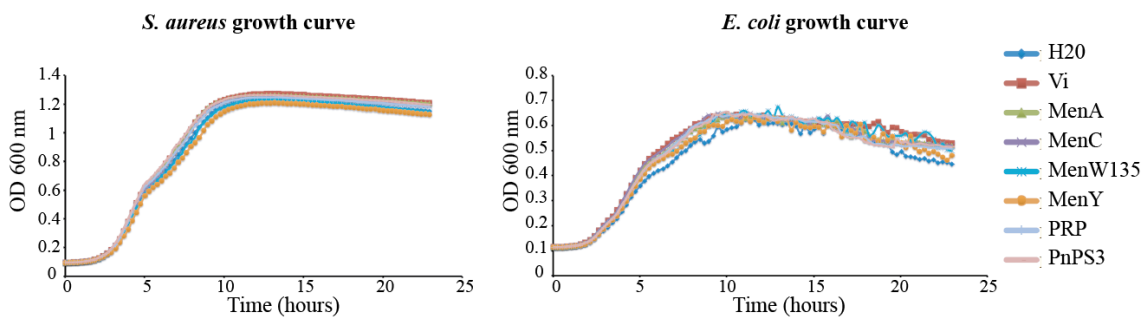

Supplementary Figure 3. **The identified antibiofilm polysaccharides are non-biocidal.** Growth curves of *S. aureus* and *E. coli* exposed to 100  $\mu\text{g/ml}$  of each indicated tested macromolecule. The bacterial strains were inoculated in microtiter plates at  $\text{OD}_{600\text{nm}}$  of 0.05 and let to grow with agitation for 24 h at 37°C. Bacterial growth was determined using a TECAN plate reader. Source data are provided as a Source Data file.



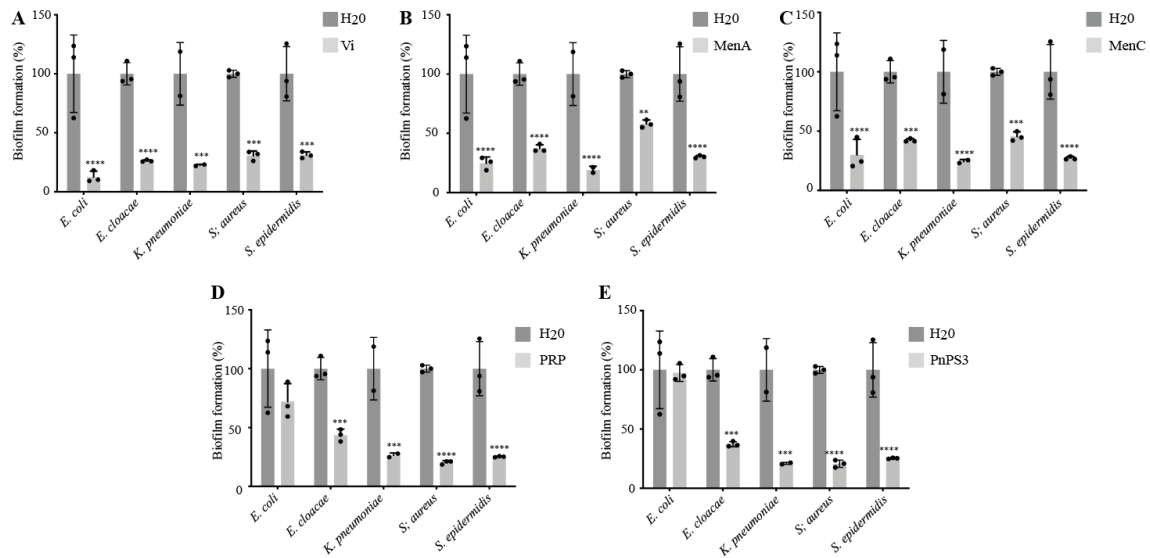

Supplementary Figure 4. **Spectrum of activity of 5 active antibiofilm polysaccharides.** Antibiofilm activity of purified polysaccharides Vi, MenA, PRP PnPS3 and MenC was assessed over a panel of relevant biofilm-forming pathogenic bacteria. Tested Gram-positive bacteria include *Staphylococcus aureus* 15981 and *Staphylococcus epidermidis* 0-47. Tested Gram-negative bacteria include *Escherichia coli*, *Enterobacter cloacae* 1092 and *Klebsiella pneumoniae* 21. Biofilm inhibition tests were performed in presence of 50 µg/ml of polysaccharide. Test of Vi (**A**), MenA (**B**), MenC (**C**), PRP (**D**), PnPS3 (**E**). Test of MenC activity was performed in a different experimental session. Distilled water was used as a negative control. Each experiment corresponds to n=3 biologically independent experiments. Source data are provided as a Source Data file. Statistical analyses correspond to two-tailed unpaired *t*-test with Welch correction. \*\* p<0.01; \*\*\* p<0.001. \*\*\*\* p<0.0001. Error bars represent SD.

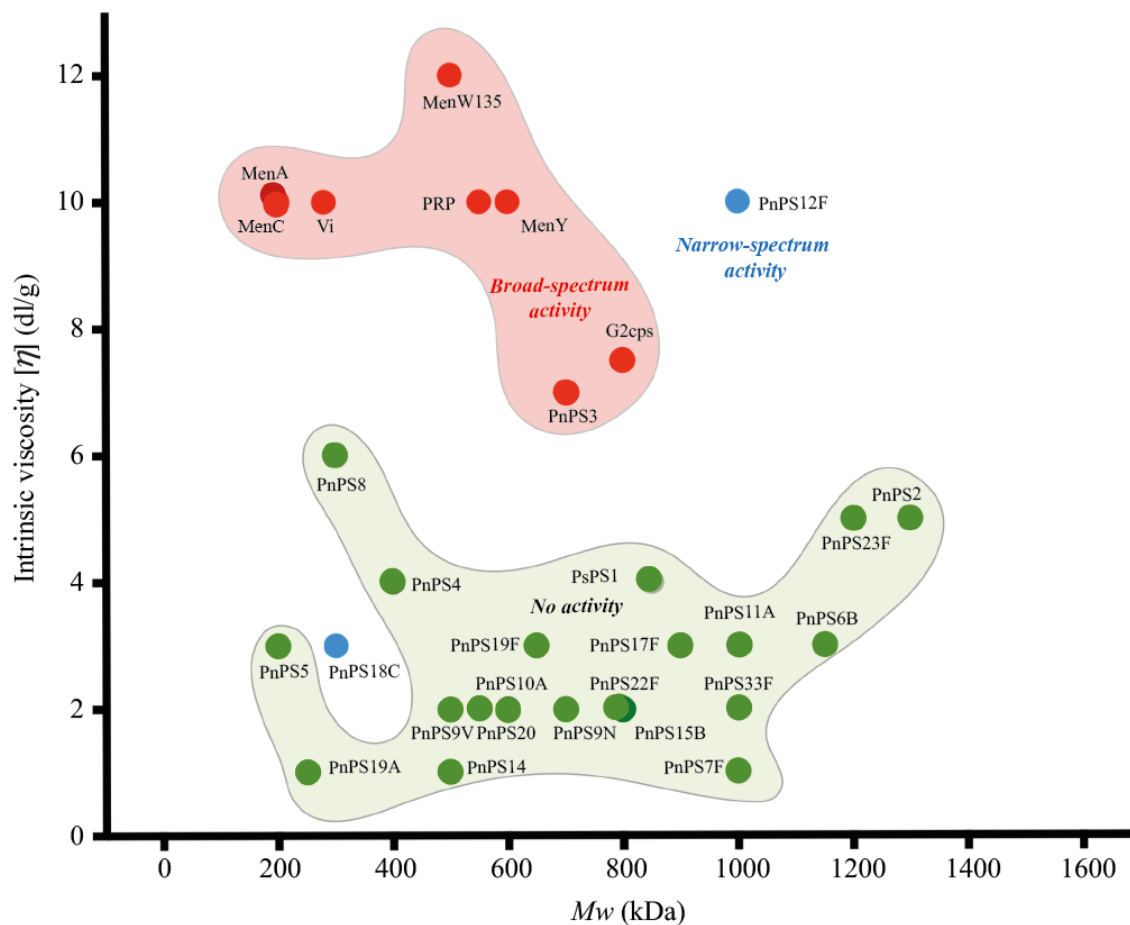

Supplementary Figure 5. **Classification of the tested polysaccharides according to their molecular weight ( $M_w$ ) and intrinsic viscosity  $[\eta]$  as indicated in Table 1.** In red shading and red points: broad spectrum active macromolecules. In green shading and green points: inactive macromolecules. In blue points: polysaccharides with narrow spectrum antibiofilm activity.

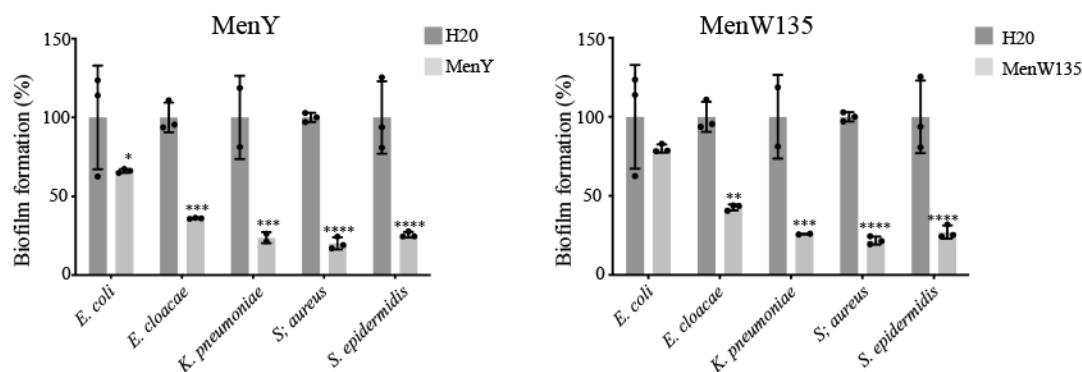

Supplementary Figure 6. **Spectrum of action of MenY and MenW135 over a panel of biofilm-forming pathogenic bacteria.** Tested Gram+ bacteria include *Staphylococcus aureus* 15981 and *Staphylococcus epidermidis* 047. Tested Gram- bacteria include *Escherichia coli* K12 MG1655 carrying the F plasmid, *Enterobacter cloacae* 1092 and *Klebsiella pneumoniae* 21. Biofilm inhibition tests were performed in the presence of 50  $\mu\text{g/ml}$  of polysaccharide. Distilled water was used as a negative control. Each experiment corresponds to n=3 biologically independent experiments. Source data are provided as a Source Data file. Statistical analyses correspond to two-tailed unpaired *t*-test with Welch correction. \* p<0.05; \*\* p<0.01; \*\*\* p<0.001; \*\*\*\* p<0.0001. Error bars represent SD.

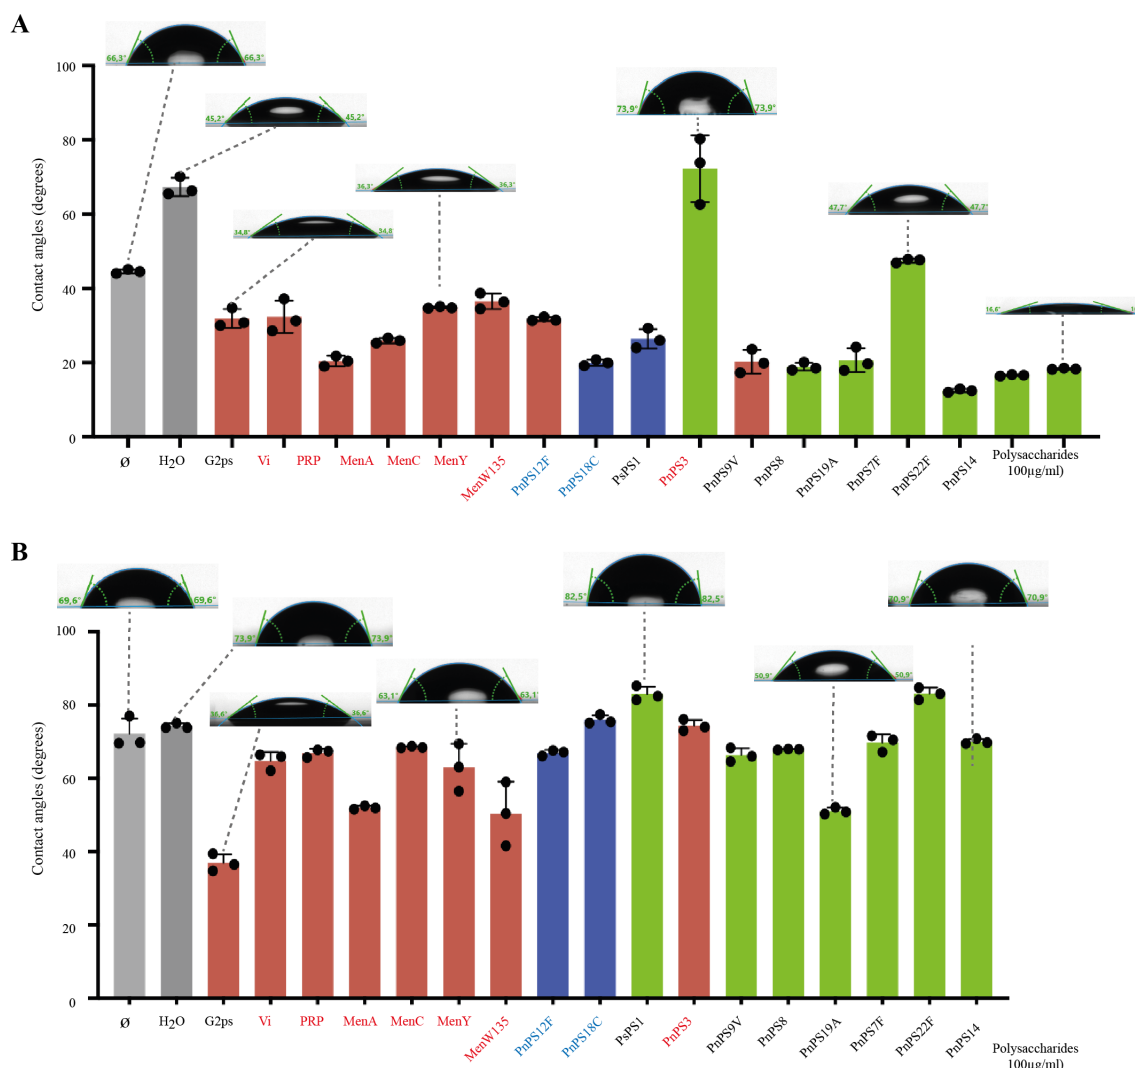

**Supplementary Figure 7. Determination of surface contact angle of a drop of water on glass or plastic surfaces treated with active and inactive polysaccharides.** Glass (A) and polyester plastic (B) microscopy slides untreated, treated with H<sub>2</sub>O or treated with active broad-spectrum activity polysaccharides (in red), active narrow-spectrum activity polysaccharides (in blue) and inactive polysaccharides (in green) (see Table 1) in the presence of 100 µg/ml of polysaccharide. Representative pictures of water droplets used to determine contact angle are presented. Each experiment corresponds to n=3 biologically independent experiments. Source data are provided as a Source Data file. Statistical analyses correspond to two-tailed unpaired *t*-test with Welch correction. Error bars represent SD.

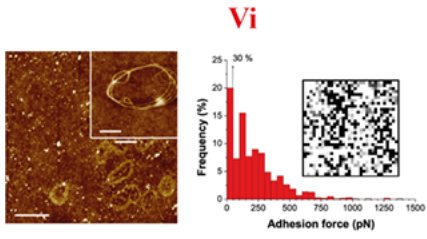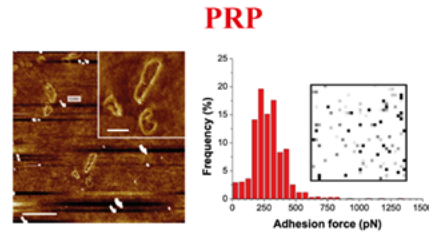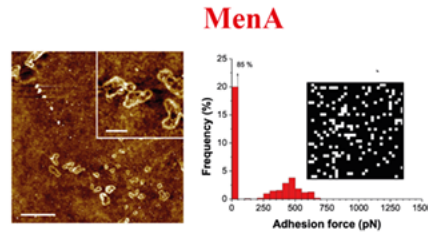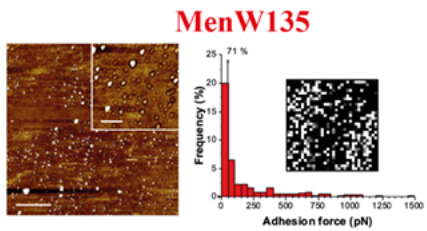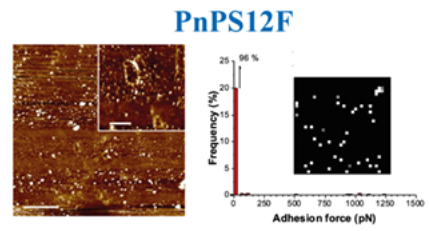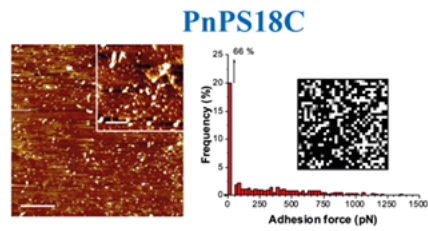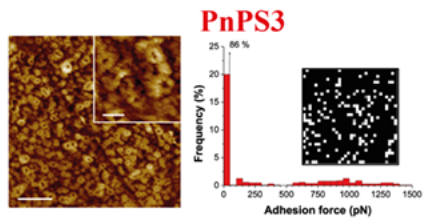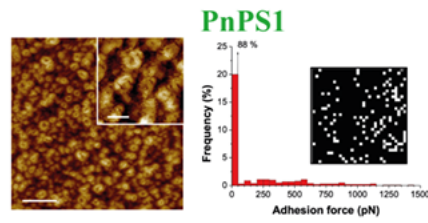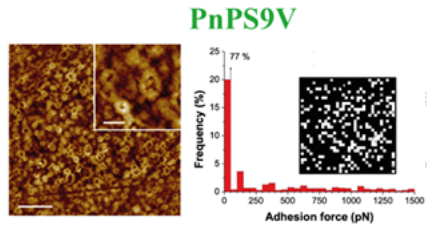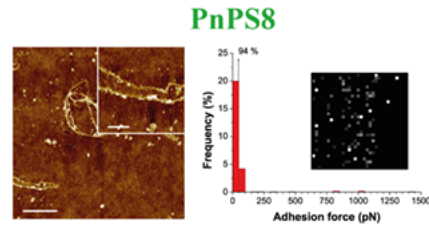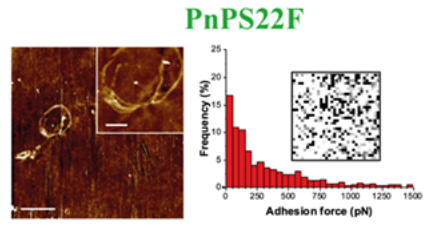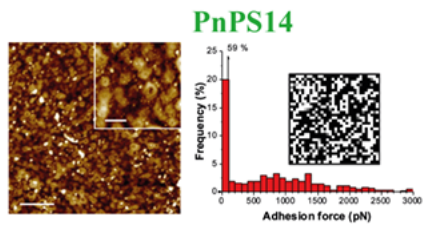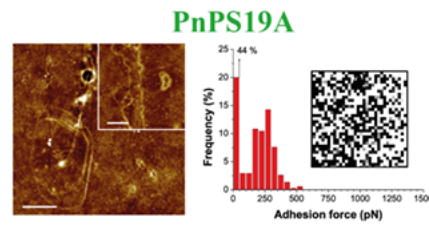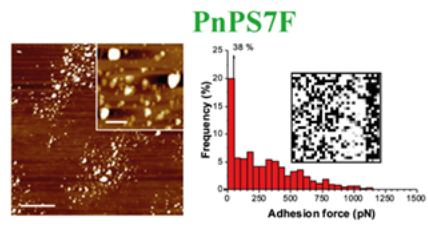

Supplementary Figure 8. **Representative AFM peak force images and adhesion force histograms of selected active and inactive polysaccharides.** Each couple of panels correspond to a given polysaccharide (specified). In each couple of panels, AFM images are on the left and adhesion force histograms on the right. Polysaccharides with broad-spectrum activity (indicated in red), narrow-spectrum activity polysaccharides (indicated in blue) and inactive polysaccharides (indicated in green) were deposited on a glass surface at 100  $\mu\text{g/mL}$  and imaged in ultrapure water. Scale bars correspond to 1  $\mu\text{m}$ . In each image, the inset shows the sample at higher magnification (scale bars = 250 nm). Adhesion force histograms ( $n=1024$  force-distance curves) and corresponding adhesion force maps were recorded between AFM hydrophobic  $\text{CH}_3$ -tips and glass surfaces coated with selected active and inactive polysaccharides. Each map has been recorded on a 5  $\mu\text{m}$  x 5  $\mu\text{m}$  area. Grey scale: 150 pN, black pixels correspond to non-adhesive events.

## SUPPLEMENTARY REFERENCES

- 1 Stroop, C. J., Xu, Q., Retzlaff, M., Abeygunawardana, C. & Bush, C. A. Structural analysis and chemical depolymerization of the capsular polysaccharide of *Streptococcus pneumoniae* type 1. *Carbohydr Res* **337**, 335-344 (2002).
- 2 Geno, K. A. *et al.* Pneumococcal Capsules and Their Types: Past, Present, and Future. *Clin Microbiol Rev* **28**, 871-899, doi:10.1128/cmr.00024-15 (2015).
- 3 Jansson, P. E., Lindberg, B., Anderson, M., Lindquist, U. & Henrichsen, J. Structural studies of the capsular polysaccharide from *Streptococcus pneumoniae* type 2, a reinvestigation. *Carbohydr Res* **182**, 111-117 (1988).
- 4 Reeves, R. E. & Goebel, W. F. Chemoimmunological studies on the soluble specific substance of pneumococcus: the structure of the type III polysaccharide. *J Biol Chem* **139**, 511-519 (1941).
- 5 Jones, C., Currie, F. & Forster, M. J. N.m.r. and conformational analysis of the capsular polysaccharide from *Streptococcus pneumoniae* type 4. *Carbohydr Res* **221**, 95-121 (1991).
- 6 Talaga, P., Bellamy, L. & Moreau, M. Quantitative determination of C-polysaccharide in *Streptococcus pneumoniae* capsular polysaccharides by use of high-performance anion-exchange chromatography with pulsed amperometric detection. *Vaccine* **19**, 2987-2994, doi:10.1016/s0264-410x(00)00535-1 (2001).
- 7 Jansson, P. E., Lindberg, B. & Lindquist, U. Structural studies of the capsular polysaccharide from *Streptococcus pneumoniae* type 5. *Carbohydr Res* **140**, 101-110 (1985).
- 8 Kenne, L., Lindberg, B. & Madden, J. K. Structural studies of the capsular antigen from *Streptococcus pneumoniae* type 26. *Carbohydr Res* **73**, 175-182 (1979).
- 9 Moreau, M., Richards, J. C., Perry, M. B. & Kniskern, P. J. Application of high-resolution n.m.r. spectroscopy to the elucidation of the structure of the specific capsular polysaccharide of *Streptococcus pneumoniae* type 7F. *Carbohydr Res* **182**, 79-99 (1988).
- 10 Jones, J. K. & Perry, M. B. The Structure of the Type VIII Pneumococcus specific polysaccharide. *J Am Chem Soc* **79**, 2787-2793 (1956).
- 11 Rutherford, T. J., Jones, C., Davies, D. B. & Elliott, A. C. NMR assignment and conformational analysis of the antigenic capsular polysaccharide from *Streptococcus pneumoniae* type 9N in aqueous solution. *Carbohydr Res* **265**, 79-96 (1994).
- 12 Calix, J. J. *et al.* Biochemical, genetic, and serological characterization of two capsule subtypes among *Streptococcus pneumoniae* Serotype 20 strains: discovery of a new pneumococcal serotype. *J Biol Chem* **287**, 27885-27894, doi:10.1074/jbc.M112.380451 (2012).
- 13 Jones, C. Full assignment of the proton and carbon NMR spectrum of the capsular polysaccharide from *Streptococcus pneumoniae* serotype 10A. *Carbohydr Res* **269**, 175-181 (1995).
- 14 Calix, J. J., Nahm, M. H. & Zartler, E. R. Elucidation of structural and antigenic properties of pneumococcal serotype 11A, 11B, 11C, and 11F polysaccharide capsules. *J Bacteriol* **193**, 5271-5278, doi:10.1128/JB.05034-11 (2011).
- 15 Leontein, K., Lindberg, B. & Lonngren, J. Structural studies of the capsular polysaccharide from *Streptococcus pneumoniae* type 12F. *Can J Chem* **59**, 2080-2085 (1980).
- 16 Lindberg, B., Lonngren, J. & Powell, D. A. Structural studies on the specific type-14 pneumococcal polysaccharide. *Carbohydr Res* **58**, 177-186 (1977).



- 17 Jones, C. & Lemercinier, X. Full NMR assignment and revised structure for the capsular polysaccharide from *Streptococcus pneumoniae* type 15B. *Carbohydr Res* **340**, 403-409, doi:10.1016/j.carres.2004.12.009 (2005).
- 18 Jones, C., Whitley, C. & Lemercinier, X. Full assignment of the proton and carbon NMR spectra and revised structure for the capsular polysaccharide from *Streptococcus pneumoniae* type 17F. *Carbohydr Res* **325**, 192-201 (2000).
- 19 Lugowski, C. & Jennings, H. J. Structural determination of the capsular polysaccharide of *Streptococcus pneumoniae* type 18C (56). *Carbohydr Res* **131**, 119-129 (1984).
- 20 Katzenellenbogen, E. & Jennings, H. J. Structural determination of the capsular polysaccharide of *Streptococcus pneumoniae* type 19A (57). *Carbohydr Res* **124**, 235-245 (1983).
- 21 Jennings, H. J., Rosell, K. G. & Carlo, D. J. Structural determination of the capsular polysaccharide of *Streptococcus pneumoniae* type-19 (19F). *Can J Chem* **58**, 1069-1074 (1980).
- 22 Richards, J. C., Perry, M. B. & Kniskern, P. J. Structural analysis of the specific capsular polysaccharide of *Streptococcus pneumoniae* type 22F. *Can J Chem* **67**, 1038-1050 (1989).
- 23 Richards, J. C., Perry, M. B. & Carlo, D. J. The specific capsular polysaccharide of *Streptococcus pneumoniae* type 20. *Can J Biochem Cell Biol* **61**, 178-190 (1983).
- 24 Lemercinier, X. & Jones, C. Full assignment of the <sup>1</sup>H and <sup>13</sup>C spectra and revision of the O-acetylation site of the capsular polysaccharide of *Streptococcus pneumoniae* Type 33F, a component of the current pneumococcal polysaccharide vaccine. *Carbohydr Res* **341**, 68-74, doi:10.1016/j.carres.2005.10.014 (2006).
- 25 Skovsted, I. C. *et al.* Purification and structure characterization of the active component in the pneumococcal 22F polysaccharide capsule used for adsorption in pneumococcal enzyme-linked immunosorbent assays. *Vaccine* **25**, 6490-6500, doi:10.1016/j.vaccine.2007.06.034 (2007).
- 26 Heyns, K. & Kiessling, G. Strukturklärung des Vi-Antigens aus *Citrobacter freundii* (E. coli) 5396/38. *Carbohydr Res* **3**, 340-353. (1967).
- 27 Crisel, R. M., Baker, R. S. & Dorman, D. E. Capsular polymer of *Haemophilus influenzae*, type b. I. Structural characterization of the capsular polymer of strain Eagan. *J Biol Chem* **250**, 4926-4930 (1975).
- 28 Lemercinier, X. & Jones, C. Full <sup>1</sup>H NMR assignment and detailed O-acetylation patterns of capsular polysaccharides from *Neisseria meningitidis* used in vaccine production. *Carbohydr Res* **296**, 83-96 (1996).
- 29 Valle, J. *et al.* Broad-spectrum biofilm inhibition by a secreted bacterial polysaccharide. *Proc Natl Acad Sci U S A* **103**, 12558-12563 (2006).
- 30 Mobley, H. L. *et al.* Pyelonephritogenic *Escherichia coli* and killing of cultured human renal proximal tubular epithelial cells: role of hemolysin in some strains. *Infect Immun* **58**, 1281-1289 (1990).
- 31 Rendueles, O. *et al.* Screening of *Escherichia coli* species biodiversity reveals new biofilm-associated antiadhesion polysaccharides. *mBio* **2**, e00043-00011, doi:10.1128/mBio.00043-11 (2011).
- 32 Valle, J. *et al.* SarA and not sigmaB is essential for biofilm development by *Staphylococcus aureus*. *Mol Microbiol* **48**, 1075-1087 (2003).
- 33 Heilmann, C., Gerke, C., Perdreau-Remington, F. & Gotz, F. Characterization of Tn917 insertion mutants of *Staphylococcus epidermidis* affected in biofilm formation. *Infect Immun* **64**, 277-282. (1996).
